# Supplementary material
Source: publisher figshare collection journal article supplement (https://karger.figshare.com/ndownloader/files/26202158)
Supplement: Supplementary file 1 [file 26202158]

**Supplementary Table 3. Multivariable Multinomial Logistic Regression of Each Physical Symptom- Dependent Variable: Frailty.**

| **Physical symptoms** | **Model 1§**  **OR (95%CI)** | | **Model 2§**  **OR (95%CI)** | |
| --- | --- | --- | --- | --- |
| **Pre-frail** | **Frail** | **Pre-frail** | **Frail** |
| Headache | 1.10(0.93-1.29) | 1.91(1.40-2.60)*** | 0.92(0.73-1.15) | 1.27(0.84-1.93) |
| Dizziness | 1.04(0.89-1.22) | 1.36(1.00-1.84)* | 0.82(0.65-1.02) | 0.63(0.41-0.99)* |
| Slurred speech | 1.45(0.95-2.22) | 1.79(0.94-3.42) | 1.30(0.84-2.01) | 1.17(0.60-2.30) |
| Numbness | 1.19(1.00-1.42) | 1.45(1.04-2.02)* | 1.06(0.84-1.34) | 0.81(0.53-1.23) |
| Cough/expectoration | 1.04(0.87-1.24) | 1.39(1.01-1.92)* | 0.86(0.69-1.08 | 0.79(0.52-1.18) |
| Shortness of breath | 1.30(1.08-1.57)** | 1.97(1.41-2.75)*** | 1.21(0.94-1.56) | 1.22(0.77-1.94) |
| Chest tightness | 1.37(1.11-1.68)** | 2.67(1.89-3.78)*** | 1.29(0.99-1.67) | 2.05(1.29-3.25)** |
| Chest pain | 1.29(1.06-1.58)* | 2.3(1.66-3.28)*** | 1.19(0.92-1.54) | 1.65(1.04-2.60)* |
| Palpitation | 1.29(1.01-1.64)* | 1.97(1.32-2.94)** | 1.14(0.85-1.51) | 1.19(0.74-1.93) |
| Syncope | 1.24(0.87-1.78) | 1.88(1.04-3.42)* | 1.09(0.74-1.59) | 1.18(0.63-2.22) |
| Joint pain | 1.13(0.97-1.32) | 1.90(1.40-2.57)*** | 0.98(0.79-1.22) | 1.28(0.84-1.94) |
| Joint stiffness | 1.14(0.95-1.36) | 1.88(1.36-2.59)*** | 1.00(0.80-1.25) | 1.28(0.86-1.90) |
| Back pain | 1.11(0.95-1.29) | 1.54(1.15-2.08)** | 0.94(0.76-1.17) | 0.85(0.56-1.30) |
| Swollen legs | 1.31(1.02-1.69)* | 2.55(1.72-3.78)*** | 1.18(0.89-1.56) | 1.81(1.15-2.83)* |
| Nausea or vomiting | 1.26(0.95-1.66) | 1.89(1.19-2.98)** | 1.09(0.80-1.50) | 1.12(0.66-1.88) |
| Dry or bitter mouth | 1.04(0.89-1.22) | 1.21(0.89-1.64) | 0.80(0.63-1.01) | 0.48(0.31-0.74)** |
| Diarrhea/constipation | 1.08(0.83-1.40) | 1.26(0.79-2.00) | 0.94(0.71-1.25) | 0.78(0.47-1.29) |
| Urinary tract irritation | 1.08(0.85-1.36) | 1.50(1.00-2.24) | 0.94(0.73-1.22) | 0.94(0.60-1.48) |
| Fever | 1.08(0.86-1.35) | 1.72(1.16-2.56)** | 0.91(0.70-1.18) | 1.03(0.65-1.65) |
| Night sweating | 1.11(0.93-1.33) | 1.64(1.17-2.29)** | 0.93(0.73-1.19) | 0.92(0.59-1.44) |
| Dry eyes | 1.15(0.97-1.35) | 1.21(0.88-1.67) | 1.00(0.80-1.25) | 0.60(0.39-0.91)* |
| Itching | 1.22(1.00-1.48) | 1.43(1.00-2.05) | 1.10(0.87-1.39) | 0.85(0.56-1.30) |

*:<0.05, **: <0.01, ***: <0.001

§logistic regression; Model1: adjusted for all covariates; Model2: model1 +number of physical symptoms

ORs: Odds Ratios; CI: Confidence Interval.
